# Supplementary material
Source: PubMed Central journal article supplement (PMC3549191)
Supplement: 11999_2012_2541_MOESM2_ESM.pdf [file 11999_2012_2541_MOESM2_ESM.pdf]

For Joint Replacement Surgery

PLEASE COMPLETE ONE FORM PER OPERATIVE SIDE

Patient Name (First Initial - Middle Initial - Last Name)

Grid for patient name entry

S.S.N. grid

Gender Male Female

Surgeon grid

CHECK ONE Right Hip Surgery Date Left Hip Surgery Date Right Knee Surgery Date Left Knee Surgery Date

1. Referred to this practice by:

2. List meds, dosage, how taken, for what problem:

Large grid for listing medications

3. Allergic to any meds, specify:

Grid for listing allergies

4. Previous surgeries (check all that apply):

- Appendectomy, Bladder suspension, Breast biopsy, Carotid endarterectomy, Cataract, Cesarean section, Cholecystectomy, Excision herniated lumbar disc, Heart bypass, Hemorrhoidectomy, Hernia repair, Gastrointestinal surgery, Hysterectomy, Prostatectomy, Thyroid surgery, Removal skin lesion, Tonsillectomy, Tubal ligation, TURP, Vasectomy, Vein stripping, Exploratory laparoscopy, Other

5. Specify other previous surgeries:

Grid for specifying other previous surgeries

For

**Joint Replacement Surgery**

PLEASE COMPLETE ONE FORM PER OPERATIVE SIDE

S.S.N.    -   -

6. Primary healthcare provider: \_\_\_\_\_

7. Specialist: \_\_\_\_\_

8. Specialist: \_\_\_\_\_

9. Specialist: \_\_\_\_\_

10. Marital Status:     Married     Never married     Divorced     Separated     Widowed

11. Number of children:     None     1     2     3     4 or more

12. Do you ever drink alcohol:     Yes     No

13. Do you smoke now:  Yes     No

14. How many years have you smoked:

**15. Family History (does anyone in your family have):**

- Back problems             Kidney disease             Lung problems             High blood pressure
- Heart problems             Artherosclerosis             Major paralysis or neurologic problems
- Diabetes                     Cancer diagnoses             Ulcer                             Any bleeding problems
- Liver disease               Depression                     Rheumatoid arthritis       Osteoarthritis or degenerative arthritis
- Previous anesthesia problems                                     Other medical problem

16. Specify other medical problem:



S.S.N. [ ] [ ] [ ] - [ ] [ ] - [ ] [ ] [ ] [ ]

**Activity Level**

44. If pain in joints, when does it hurt:  Never  Only occasionally or intermittently  
 Only when I first get up from a sitting or standing position  
 Only when I walk more than 30 minutes  
 Anytime I walk  At all times

**45. Pain Scale: 0 = No pain/10 = Severe pain:**

- 0 - No pain  1  2  3  4  5  6  7  8  9  10 - Severe pain

**46. Current general activity level:**

- I am bedridden or confined to a wheelchair  
 I am sedentary (in a chair) with minimal capacity for walking or other activity  
 I am partially sedentary and can do desk work/light housekeeping or bench work  
 I perform light labor such as heavy house cleaning/assembly line work/yard work/or light sports  
 I perform moderate manual labor with lifting heavy weight and/or participate in moderate sports  
 I participate in heavy manual labor/frequently lift heavy weights or participate in vigorous sports

**47. Physical therapy for arthritis:**

- Never  Less than once per week  Once per week  More than once per week but not daily  Every day

**48. Number of time had joint injections (steroid) for arthritis:**

- None  1  2  3  More than 3

**49. During past week how often taken pain medications:**

- 3 or more times a day  Once or twice a day  Once every couple of days  Once  Not at all

**50. During past 6 months did you take NSAIDS medication:**  Yes  No

**51. During past 6 months taken any narcotic pain medication for arthritis:**  Yes  No

**52. Do you use a walking aid:**  Yes  No

53. If using a walking aid, why:  Hip pain/discomfort  Knee pain/discomfort  
 Other joint problems  Stability



S.S.N.    -   -

**7. Planned Pre-Operative Hip Procedure-Right:**

- Primary THR       Revision THR - Acetabular Components       Revision THR - Femoral Component
- Conversion of Previous Surgery to THR       Preparation and Insertion of buld allograft
- Removal of Hardware       Resection Arthroplasty

**8. Planned Pre-Operative Hip Procedure-Left:**

- Primary THR       Revision THR - Acetabular Components       Revision THR - Femoral Component
- Conversion of Previous Surgery to THR       Preparation and Insertion of buld allograft
- Removal of Hardware       Resection Arthroplasty

**9. Planned Pre-Operative Knee Procedure-Right:**

- Primary TKR with patella       Revision TKR-Patellar component       Revision TKR - Tibial component
- Revision TKR - Femoral component       Medial Unicompartmental Knee replacement
- Lateral Unicompartmental Knee replacement       Conversion of Previous Surgery to TKR
- Resection Arthroplasty       Prep and insertion of bulk allograft

**10. Planned Pre-Operative Knee Procedure-Left:**

- Primary TKR with patella       Revision TKR-Patellar component       Revision TKR - Tibial component
- Revision TKR - Femoral component       Medial Unicompartmental Knee replacement
- Lateral Unicompartmental Knee replacement       Conversion of Previous Surgery to TKR
- Resection Arthroplasty       Prep and insertion of bulk allograft

For

• Right Knee

Joint Replacement Surgery

PLEASE COMPLETE ONE FORM PER OPERATIVE SIDE

Patient Name (First Initial - Middle Initial - Last Name)

Grid for patient name input

S.S.N.

Grid for social security number input

Gender  Male  Female

Surgeon

Grid for surgeon name input

Date of Surgery

Grid for date of surgery input

(MM-DD-YYYY)

1. Skin Status:  Normal  Scar(s)  Abnormal

2. Specify previous knee incision:  Medial  Lateral  Anterior  Transverse  Parapatellar  Longitudinal  Puncture wounds  Hockey stick

3. Previous knee operations:  Yes  No

4. Specify previous knee operations:

- Arthrodesis, Arthroscopic meniscectomy, Arthroscopy (other), Chondroplasty, Femoral osteotomy, Lateral PF release, Ligament reconstruct, Open meniscectomy, ORIF femur, ORIF patella, ORIF tibia, Patellectomy, PF realignment, Revision TKR, Synovectomy, Tibial osteotomy, Total knee replacement, Unicompartmental knee, Other

5. Specify other knee operation: \_\_\_\_\_

6. Associated conditions with arthritis:  Yes  No

7. If there were associated conditions with arthritis, check all that apply:

- Ankylosing spondylitis, Congenital hip dysplasia, Gout, Hemochromatosis, Juvenile rehumatoid arthritis, Legg-Calve-Perthes, Osteochondritis dissecans, Osteonecrosis, Paget's disease, Pigmented villonodular synovitis, Post septic, Post traumatic, Protrusio, Pseudogout, Psoriasis, Rheumatoid arthritis, Slipped capital femoral epiphysis, Systemic lupus erthematous, Other

8. If other associated conditions, specify: \_\_\_\_\_

9. Previous knee infection:  Yes  No

10. Effusion:  None  Mild/Moderate  Severe/Extreme

11. Tenderness:  Anterior  Medial  Lateral  Posterior  Patella  Combination
