# Supplementary material
Source: PubMed Central journal article supplement (PMC3549191)
Supplement: 11999_2012_2541_MOESM3_ESM.pdf [file 11999_2012_2541_MOESM3_ESM.pdf]

**New Mexico Center**  
**For**  
**Joint Replacement Surgery**

Answer the following questions regarding  
 your overall activity level.

Patient Name (First Initial - Middle Initial - Last Name)  -  -   
 (MM-DD-YYYY)

Form Completion Date  -  -

S.S.N  -  -

Gender  Male  Female Surgeon

**CHECK ONE**

Right Hip  Right Hip Surgery Date  -  -

Left Hip  Left Hip Surgery Date  -  -

Right Knee  Right Knee Surgery Date  -  -

Left Knee  Left Knee Surgery Date  -  -

1. In general, would you say your health is:  Excellent  Very Good  Good  Fair  Poor

The following items are about activities you might do during a typical day. Does your health now limit you in these activities? If so, how much? (Check one box on each line)

- |                                                                                                    |                          |                          |                          |
|----------------------------------------------------------------------------------------------------|--------------------------|--------------------------|--------------------------|
|                                                                                                    | Yes, limited a lot       | Yes, limited a little    | No, not limited at all   |
| 2. Moderate Activities, such as moving a table, pushing a vacuum cleaner, bowling or playing golf: | <input type="checkbox"/> | <input type="checkbox"/> | <input type="checkbox"/> |
| 3. Climbing several flights of stairs:                                                             | <input type="checkbox"/> | <input type="checkbox"/> | <input type="checkbox"/> |

During the past 4 weeks have you had any of the following problems with your work or other regular daily activities as a result of your physical health? (Check one box on each line)

- |                                                          |                          |                          |
|----------------------------------------------------------|--------------------------|--------------------------|
|                                                          | Yes                      | No                       |
| 4. Accomplished less than you would like:                | <input type="checkbox"/> | <input type="checkbox"/> |
| 5. Were limited in the kind of work or other activities: | <input type="checkbox"/> | <input type="checkbox"/> |

During the past 4 weeks have you had any of the following problems with your work or other regular daily activities as a result of any emotional problems (such as feeling depressed or anxious)? (Check one box on each line)

- |                                                              |                          |                          |
|--------------------------------------------------------------|--------------------------|--------------------------|
|                                                              | Yes                      | No                       |
| 6. Accomplished less than you would like:                    | <input type="checkbox"/> | <input type="checkbox"/> |
| 7. Didn't do work or other activities as carefully as usual: | <input type="checkbox"/> | <input type="checkbox"/> |

8. During the past 4 weeks how much did pain interfere with your normal work (including both work outside the home and housework)? (Check one box)
- Not at all  A little bit  Moderately  Quite a bit  Extremely

These questions are about how you feel and how things have been with you during the past 4 weeks. For each question, please give the one answer that comes closest to the way you have been feeling.

How much of the time during the past 4 weeks...(Check one box on each line)

- |                                         |                          |                          |                          |                          |                          |                          |
|-----------------------------------------|--------------------------|--------------------------|--------------------------|--------------------------|--------------------------|--------------------------|
|                                         | All of the Time          | Most of the Time         | A Good Bit of the Time   | Some of the Time         | A Little of the Time     | None of the Time         |
| 9. Have you felt calm and peaceful?     | <input type="checkbox"/> |
| 10. Did you have a lot of energy?       | <input type="checkbox"/> |
| 11. Have you felt downhearted and blue? | <input type="checkbox"/> |

12. During the past 4 weeks, how much of the time has your physical health or emotional problems interfered with your visiting with friends, relatives, etc.?(Check one box)

- |                          |                          |                          |                          |                          |
|--------------------------|--------------------------|--------------------------|--------------------------|--------------------------|
| <input type="checkbox"/> |
| All of the time          | Most of the time         | Some of the time         | A little of the time     | None of the time         |

For Joint Replacement Surgery

PLEASE COMPLETE ONE FORM PER OPERATIVE SIDE

Patient Name (First Initial - Middle Initial - Last Name)

Form for Patient Name with boxes for initials and last name.

S.S.N.

Form for Social Security Number with boxes.

Gender Male Female

Surgeon

Form for Surgeon name with boxes.

CHECK ONE

Right Hip Surgery Date

Right hip

Date form for Right Hip Surgery.

Left Hip Surgery Date

Left hip

Date form for Left Hip Surgery.

Right Knee Surgery Date

Right knee

Date form for Right Knee Surgery.

Left Knee Surgery Date

Left knee

Date form for Left Knee Surgery.

1. Referred to this practice by:

2. List meds, dosage, how taken, for what problem:

Large text area for listing medications and dosages.

3. Allergic to any meds, specify:

Text area for specifying allergies.

4. Previous surgeries (check all that apply):

- List of surgical procedures with checkboxes: Appendectomy, Bladder suspension, Breast biopsy, Carotid endarterectomy, Cataract, Cesarean section, Cholecystectomy, Excision herniated lumbar disc, Heart bypass, Hemorrhoidectomy, Hernia repair, Gastrointestinal surgery, Hysterectomy, Prostatectomy, Thyroid surgery, Removal skin lesion, Tonsillectomy, Tubal ligation, TURP, Vasectomy, Vein stripping, Exploratory laparoscopy, Other.

5. Specify other previous surgeries:

Text area for specifying other previous surgeries.

**For**

**Joint Replacement Surgery**

PLEASE COMPLETE ONE FORM PER OPERATIVE SIDE

S.S.N.    -   -

6. Primary healthcare provider: \_\_\_\_\_

7. Specialist: \_\_\_\_\_

8. Specialist: \_\_\_\_\_

9. Specialist: \_\_\_\_\_

10. Marital Status:     Married     Never married     Divorced     Separated     Widowed

11. Number of children:     None     1     2     3     4 or more

12. Do you ever drink alcohol:     Yes     No

13. Do you smoke now:  Yes     No

14. How many years have you smoked:

**15. Family History (does anyone in your family have):**

- Back problems             Kidney disease             Lung problems             High blood pressure
- Heart problems             Artherosclerosis             Major paralysis or neurologic problems
- Diabetes                     Cancer diagnoses             Ulcer                             Any bleeding problems
- Liver disease                 Depression                     Rheumatoid arthritis         Osteoarthritis or degenerative arthritis
- Previous anesthesia problems                     Other medical problem

16. Specify other medical problem:



S.S.N.    -   -

**Activity Level**

44. If pain in joints, when does it hurt:  Never  Only occasionally or intermittently  
 Only when I first get up from a sitting or standing position  
 Only when I walk more than 30 minutes  
 Anytime I walk  At all times

**45. Pain Scale: 0 = No pain/10 = Severe pain:**

- 0 - No pain  1  2  3  4  5  6  7  8  9  10 - Severe pain

**46. Current general activity level:**

- I am bedridden or confined to a wheelchair  
 I am sedentary (in a chair) with minimal capacity for walking or other activity  
 I am partially sedentary and can do desk work/light housekeeping or bench work  
 I perform light labor such as heavy house cleaning/assembly line work/yard work/or light sports  
 I perform moderate manual labor with lifting heavy weight and/or participate in moderate sports  
 I participate in heavy manual labor/frequently lift heavy weights or participate in vigorous sports

**47. Physical therapy for arthritis:**

- Never  Less than once per week  Once per week  More than once per week but not daily  Every day

**48. Number of time had joint injections (steroid) for arthritis:**

- None  1  2  3  More than 3

**49. During past week how often taken pain medications:**

- 3 or more times a day  Once or twice a day  Once every couple of days  Once  Not at all

**50. During past 6 months did you take NSAIDS medication:  Yes  No**

**51. During past 6 months taken any narcotic pain medication for arthritis:  Yes  No**

**52. Do you use a walking aid:  Yes  No**

- 53. If using a walking aid, why:**  Hip pain/discomfort  Knee pain/discomfort  
 Other joint problems  Stability





New Mexico Center  
For  
Joint Replacement Surgery

**General Physical Exam/  
Evaluation and Treatment**

PLEASE COMPLETE ONE FORM PER OPERATIVE SIDE

S.S.N.  -  -

**7. Planned Pre-Operative Hip Procedure-Right:**

- Primary THR       Revision THR - Acetabular Components       Revision THR - Femoral Component  
 Conversion of Previous Surgery to THR       Preparation and Insertion of buld allograft  
 Removal of Hardware       Resection Arthroplasty

**8. Planned Pre-Operative Hip Procedure-Left:**

- Primary THR       Revision THR - Acetabular Components       Revision THR - Femoral Component  
 Conversion of Previous Surgery to THR       Preparation and Insertion of buld allograft  
 Removal of Hardware       Resection Arthroplasty

**9. Planned Pre-Operative Knee Procedure-Right:**

- Primary TKR with patella       Revision TKR-Patellar component       Revision TKR - Tibial component  
 Revision TKR - Femoral component       Medial Unicompartmental Knee replacement  
 Lateral Unicompartmental Knee replacement       Conversion of Previous Surgery to TKR  
 Resection Arthroplasty       Prep and insertion of bulk allograft

**10. Planned Pre-Operative Knee Procedure-Left:**

- Primary TKR with patella       Revision TKR-Patellar component       Revision TKR - Tibial component  
 Revision TKR - Femoral component       Medial Unicompartmental Knee replacement  
 Lateral Unicompartmental Knee replacement       Conversion of Previous Surgery to TKR  
 Resection Arthroplasty       Prep and insertion of bulk allograft



New Mexico Center  
For  
Joint Replacement Surgery

**Pre-Op Hip Physical Exam**  
**Right Hip**

PLEASE COMPLETE ONE FORM PER OPERATIVE SIDE

S.S.N.    -   -

**11. Specify Previous Operations**

- |                                                     |                                                      |                                                     |
|-----------------------------------------------------|------------------------------------------------------|-----------------------------------------------------|
| <input type="checkbox"/> Bi/uni replace             | <input type="checkbox"/> Bone graft femoral neck     | <input type="checkbox"/> Core decompress            |
| <input type="checkbox"/> Curettage tumor            | <input type="checkbox"/> Fusion                      | <input type="checkbox"/> Girdlestone resection      |
| <input type="checkbox"/> Multi revision THR         | <input type="checkbox"/> ORIF head fracture          | <input type="checkbox"/> ORIF femoral head fracture |
| <input type="checkbox"/> ORIF femoral neck fracture | <input type="checkbox"/> ORIF intertroch. fracture   | <input type="checkbox"/> ORIF other femur fracture  |
| <input type="checkbox"/> Pelvis osteotomy           | <input type="checkbox"/> Proxi. femoral osteotomy    | <input type="checkbox"/> Revise acet. cup           |
| <input type="checkbox"/> Revise femoral stem        | <input type="checkbox"/> Revise THR (acet and femur) | <input type="checkbox"/> Surface replace            |
| <input type="checkbox"/> Total hip replace          | <input type="checkbox"/> Troch. advance              | <input type="checkbox"/> Resurface arthroplasty     |
| <input type="checkbox"/> Other                      |                                                      |                                                     |

**12. Specify other hip operations:**

**13. Previous hip infection:**  Yes  No

**14. Range of Motion (degrees) - Operative Side (All Measurements Active Assisted, Supine, Goniometer)**

Fixed Flexion:    °    Abduction:    °    External Rotation in Extension:    °  
Further Flexion to:    °    Adduction:    °    Internal Rotation in Extension:    °

**15. Deformity (operative side):**  Fixed ADD  $\geq$  10 degrees     Leg Length Discrepancy  $\geq$  3.5cm  
 Fixed IRE  $\geq$  10 degrees     PFC  $\geq$  30 degrees     None of the above

**16. Trendelenburg:**  Positive     Level/equivocal     Negative     Unable to Test

**17. True Length Discrepancy:**  Legs Equal     Right Short     Left Short

If Right or Left Short Specify: True:   mm

**18. Limp without Support:**  No Limp     Slight     Moderate  
 Severe     Unable to Walk     N/A (always use support)

**19. On which side does patient limp:**  Right     Left     Both     N/A (does not limp)
