# Supplementary material
Source: PubMed Central journal article supplement (PMC3549191)
Supplement: 11999_2012_2541_MOESM5_ESM.pdf [file 11999_2012_2541_MOESM5_ESM.pdf]

**New Mexico Center**  
**For**  
**Joint Replacement Surgery**

Answer the following questions regarding  
 your overall activity level.

Patient Name (First Initial - Middle Initial - Last Name)  -  -   
 (MM-DD-YYYY)

Form Completion Date  -  -   
 S.S.N  -  -

Gender  Male  Female Surgeon

**CHECK ONE**

Right Hip  Right Hip Surgery Date  -  -   
 Left Hip  Left Hip Surgery Date  -  -   
 Right Knee  Right Knee Surgery Date  -  -   
 Left Knee  Left Knee Surgery Date  -  -

1. In general, would you say your health is:  Excellent  Very Good  Good  Fair  Poor

The following items are about activities you might do during a typical day. Does your health now limit you in these activities? If so, how much? (Check one box on each line)

- |                                                                                                    |                          |                          |                          |
|----------------------------------------------------------------------------------------------------|--------------------------|--------------------------|--------------------------|
|                                                                                                    | Yes, limited a lot       | Yes, limited a little    | No, not limited at all   |
| 2. Moderate Activities, such as moving a table, pushing a vacuum cleaner, bowling or playing golf: | <input type="checkbox"/> | <input type="checkbox"/> | <input type="checkbox"/> |
| 3. Climbing several flights of stairs:                                                             | <input type="checkbox"/> | <input type="checkbox"/> | <input type="checkbox"/> |

During the **past 4 weeks** have you had any of the following problems with your work or other regular daily activities as a result of your physical health? (Check one box on each line)

- |                                                          |                          |                          |
|----------------------------------------------------------|--------------------------|--------------------------|
|                                                          | Yes                      | No                       |
| 4. Accomplished less than you would like:                | <input type="checkbox"/> | <input type="checkbox"/> |
| 5. Were limited in the kind of work or other activities: | <input type="checkbox"/> | <input type="checkbox"/> |

During the **past 4 weeks** have you had any of the following problems with your work or other regular daily activities as a result of any emotional problems (such as feeling depressed or anxious)? (Check one box on each line)

- |                                                              |                          |                          |
|--------------------------------------------------------------|--------------------------|--------------------------|
|                                                              | Yes                      | No                       |
| 6. Accomplished less than you would like:                    | <input type="checkbox"/> | <input type="checkbox"/> |
| 7. Didn't do work or other activities as carefully as usual: | <input type="checkbox"/> | <input type="checkbox"/> |

8. During the **past 4 weeks** how much did pain interfere with your normal work (including both work outside the home and housework)? (Check one box)

- Not at all  A little bit  Moderately  Quite a bit  Extremely

These questions are about how you feel and how things have been with you during the past 4 weeks. For each question, please give the one answer that comes closest to the way you have been feeling.

How much of the time during the **past 4 weeks**...(Check one box on each line)

- |                                         |                          |                          |                          |                          |                          |                          |
|-----------------------------------------|--------------------------|--------------------------|--------------------------|--------------------------|--------------------------|--------------------------|
|                                         | All of the Time          | Most of the Time         | A Good Bit of the Time   | Some of the Time         | A Little of the Time     | None of the Time         |
| 9. Have you felt calm and peaceful?     | <input type="checkbox"/> |
| 10. Did you have a lot of energy?       | <input type="checkbox"/> |
| 11. Have you felt downhearted and blue? | <input type="checkbox"/> |

12. During the **past 4 weeks**, how much of the time has your physical health or emotional problems interfered with your visiting with friends, relatives, etc.? (Check one box)

- All of the time  Most of the time  Some of the time  A little of the time  None of the time

**New Mexico Center**  
**For**  
**Joint Replacement Surgery**

Answer the following questions  
 regarding your • **Right Hip**  
Replacement only.

Patient Name (First Initial - Middle Initial - Last Name)

-  -

Gender  Male  Female

Date of Surgery

-  -

(MM-DD-YYYY)

Form Completion Date

-  -

S.S.N.  -  -

Surgeon

**1. Which of the following categories would best describe your hip pain?**

- None/you ignore it
- Slight, occasional ache
- Mild, no effect on your ordinary activity
- Moderate, tolerable, you make concessions
- Marked, you have serious limitations
- You are totally disabled because of pain

**2. Do you need support when walking?**

- None  Two Canes
- Cane for long walks  Two Crutches
- Cane full time  Walker
- One Crutch  Unable to walk

**3. How far can you walk without stopping because of hip pain?**

- Unlimited  Indoors only
- 6 blocks  Limited to bed and chair
- 2-3 blocks

**4. How do you go up and down stairs?**

- Normally without using a railing
- Normally using a railing
- In any other manner
- Unable to do stairs

**5. How do you put on shoes and socks?**

- With ease
- With difficulty
- Unable

**6. How long can you sit in a chair?**

- Comfortably in ordinary chair one hour
- On a high chair for one-half hour
- Unable to sit comfortably in any chair

**7. Are you able to use public transportation, such as a bus or subway if you wanted to?**

- Yes  No

**8. How much do you limp without support?**

- None  Severe
- Slight  Unable to walk
- Moderate

**9. Are you satisfied with the results of your hip replacement surgery?**

- Yes  No

For Joint Replacement Surgery

PLEASE COMPLETE ONE FORM PER OPERATIVE SIDE

Patient Name (First Initial - Middle Initial - Last Name)

Form for Patient Name with boxes for initials and last name

Date of Surgery

Form for Date of Surgery with boxes for month, day, and year

(MM-DD-YYYY)

Operative Side Left Right

Gender Male Female

Form Completion Date

S.S.N. form with boxes for digits

Surgeon form with boxes for name

Form for Form Completion Date with boxes for month, day, and year

Post Op Exam Period 6 Weeks 3 Months 6 Months 1 Year 2 Year 3 Year 4 Year 5 Year 6 Years 7 Years 8 Years Specify Years

Specified Years

Form for Specified Years with boxes for digits

1. What is the patient's activity level?

- Regularly participate in impact sports... Sometimes participate in impact sports... Regularly participate in very active events... Regularly participate in active events... Regularly participate in moderate activities... Sometimes participate in moderate activities... Regularly participate in mild activities... Sometimes participate in mild activities... Mostly inactive... Wholly inactive

2. Does the patient have hip pain? Yes If YES, Specify:

No If NO, Form is Complete

a. Identify Area and Severity of Pain:

Place X in box at corresponding area of pain. Select level of hip pain and place X in appropriate box.

Table with Area of Hip Pain (Groin, Trochanter, Anterior Thigh, Posterior Thigh, Medial Thigh, Lateral Thigh, Buttock) and Severity of Pain (Mild, Moderate, Severe)

b. When does the hip pain occur?

- Start-up (1st step then better)
After walking 30 min or >6 blocks
After any walking
At rest
At all times

KEY: Severity of Pain

Mild - Ignores Pain
Moderate - Occasional Medication
Severe - Continual Medication

For

• Right Hip

Joint Replacement Surgery

PLEASE COMPLETE ONE FORM PER OPERATIVE SIDE

Patient Name (First Initial - Middle Initial - Last Name)

Grid for patient name input

Date of Surgery

Grid for date of surgery input

Gender  Male  Female

(MM-DD-YYYY)

Exam Date

S.S.N. grid

Surgeon grid

Exam date grid

1. Skin Status  Healed  Not Healed  Erythema (Specify other): 
 Warmth  Soft Tissue Swelling  Other

2. Dependent Edema:  Yes  No

3. Pulses Intact:  Yes  No

4. Specify Pulses Not Intact

5. Neurological Status Intact:  Yes  No

6. Specify Neurological Status Not Intact:

7. Range of Motion (degrees) - Operative Side (All Measurements Active Assisted, Supine, Goniometer)

Fixed Flexion: ° Abduction: ° External Rotation in Extension: °

Further Flexion to: ° Adduction: ° Internal Rotation in Extension: °

8. Deformity (operative side)  Fixed ADD >= 10 degrees  Leg Length Discrepancy >= 3.5cm
 Fixed IRE >= 10 degrees  PFC >= 30 degrees  None of the above

9. Trendelenburg:  Positive  Level/equivocal  Negative  Unable to Test

10. True Length Discrepancy:  Legs Equal  Right Short  Left Short

If Right or Left Short Specify: True:  mm

11. Limp without Support:  No Limp  Slight  Moderate
 Severe  Unable to Walk  N/A (always use support)

12. On which side does patient limp:  Right  Left  Both

13. Complications? If Yes, Complete Complication Report Form  Yes  No
